# Supplementary material for: Benthic foraminiferal species tolerance for hydrothermal activity: a case of study from the Lucky Strike vent field
Source: Copernicus journal article supplement (doi:10.5194/egusphere-2026-133), 2026-01-23
Supplement: Supplementary file 1 [file Supplementary 2_XRF.xlsx]

## Sheet: Feuil1
Sample	Site	Location	LOI	SiO2	TiO2	Al2O3	Fe2O3	MnO	MgO	CaO	Na2O	K2O	P2O5	S		As	Ba	Ce	Co	Cr	Cu	Mo	Nb	Ni	Rb	Sr	V	Y	Zn	Zr
			wt. %	wt. %	wt. %	wt. %	wt. %	wt. %	wt. %	wt. %	wt. %	wt. %	wt. %	wt. %		ppm	ppm	ppm	ppm	ppm	ppm	ppm	ppm	ppm	ppm	ppm	ppm	ppm	ppm	ppm
755-3-CL10-0-1	Monsegur N	near field	22.21	22.89	0.54	9.37	10.94	1.66	4.02	23.59	1.12	0.12	0.45	0.87		97	6375	30	86	250	2631	39	10	150	10	928	294	21	608	49
755-3-CL10-1-2	Monsegur N	near field	23.95	20.96	0.49	8.05	11.22	1.08	3.83	25.37	1.15	0.11	0.46	0.91		100	6392	30	65	270	2300	27	9	118	10	998	286	20	557	47
755-3-CL11-0-1	Monsegur N	near field	22.17	23.96	0.53	9.19	10.27	0.67	3.69	23.99	1.34	0.13	0.41	1.03		86	9053	25	49	261	4509	21	10	76	11	1004	265	18	525	48
755-3-CL11-1-2	Monsegur N	near field	22.5	23.1	0.53	8.78	10.79	0.64	3.46	24.72	1.22	0.13	0.43	1.01		91	9065	28	47	238	2312	20	10	73	10	1056	280	19	530	49
755-3-CL6-1-2	Monsegur N	near field	12.56	28.57	0.655	11.63	11.995	1.675	4.89	21.285	1.53	0.18	0.465	0.7		80	6707	27	78	410.5	2337.5	43	13	174.5	10	715	301	20	527	60
757-5-CL11-0-1	Capelinhos	near field	19.14	7.56	0.15	2.47	46.48	0.41	0.84	3.19	1.67	0.16	0.69	13.86		408	44183	25	40	26	49580	139	3	24	7	912	924	22	10180	25
757-5-CL11-1-2	Capelinhos	near field	19.53	8.39	0.17	2.86	44.98	0.27	0.83	3.55	1.63	0.19	0.61	13.64		329	44648	19	28	42	47835	144	4	27	6	873	789	21	10904	24
759-7-CL6-1-2	Eiffel Tower W	near field	24.14	17.97	0.38	6.3	15.49	5.7	2.91	21.08	1.37	0.11	0.74	n.a.		n.a.	6697	n.a.	n.a.	166	4424	n.a.	n.a.	106.957	n.a.	967	n.a.	n.a.	794	56
759-7-CL11-0-1	Eiffel Tower W	near field	18.63	19.02	0.3	4.59	35.61	7.53	2.66	2.71	4.14	0.41	1.99	0.74		273	5566	31	711	89	4363	355	6	167	11	396	932	27	221	34
759-7-CL11-1-2	Eiffel Tower W	near field	17.11	19.84	0.35	5.26	31.63	11.51	2.83	2.89	3.63	0.51	1.57	0.71		304	6929	25	580	93	6600	443	8	277	13	444	1033	30	393	42
759-7-CL6-0-1	Eiffel Tower W	near field	23.42	20.83	0.45	7.51	13.78	3.32	3.25	21.96	1.3	0.11	0.66	0.78		159	7260	35	114	207	3610	119	9	120	10	948	384	20	727	43
760-8-CL6-0-1	Eiffel Tower E	near field	20.52	23.68	0.57	9.19	13.57	0.53	3.58	21.2	1.63	0.16	0.45	1.17		102	10348	25	59	219	8792	24	11	67	11	998	294	19	604	50
760-8-CL6-1-2	Eiffel Tower E	near field	14.8	29.92	0.73	11.89	13.39	0.72	4.43	16.95	1.8	0.24	0.4	1.05		90	12591	26	62	294	6711	27	13	77	11	867	302	19	623	58
760-8-CL7-0-1	Eiffel Tower E	near field	12.49	24.83	0.59	9.85	26.33	0.39	4.62	12.66	1.77	0.25	0.26	2.1		52	7986	21	48	271	3469	18	12	99	9	559	245	17	364	49
760-8-CL7-1-2	Eiffel Tower E	near field	10.95	28.91	0.71	11.32	18.76	0.8	4.76	16.38	1.74	0.23	0.37	1.92		77	11100	23	66	375	10233	32	14	134	10	749	282	19	533	54
761-9-CL6-0-1	South Crystal	near field	11.55	31.4	0.61	11.5	21.22	1.88	5.08	6.8	2.4	0.5	0.66	1.94		138	28727	21	43	274	5387	63	10	82	11	1217	438	20	1151	49
761-9-CL6-1-2	South Crystal	near field	9.76	34.12	0.69	12.76	20.43	1.73	5.1	6.01	2.41	0.54	0.57	1.63		118	26782	23	40	288	3101	60	12	83	11	1008	439	21	912	58
762-10-CL11-0-1	Monsegur S	near field	9.14	38.32	0.56	12.12	16.37	4.42	4.04	9.11	2.93	0.44	1.11	0.74		169	6652	23	47	361	1094	265	9	68	11	459	225	15	117	44
762-10-CL11-1-2	Monsegur S	near field	3.42	46.74	0.67	17.96	8.12	1.78	4.73	12.38	2.14	0.34	0.42	0.66		60	4818	23	29	406	403	104	10	67	9	452	163	13	53	48
762-10-CL6-0-1	Monsegur S	near field	5.9	42.45	0.73	14.4	13.91	1.78	5.09	10.55	2.8	0.4	0.77	0.58		128	5201	26	46	496	961	84	11	110	11	421	233	17	118	54
762-10-CL6-1-2	Monsegur S	near field	2.59	47.55	0.91	16.97	8.69	0.41	6.08	12.54	2.47	0.4	0.31	n.a.		n.a.	5399	n.a.	n.a.	671	227	n.a.	n.a.	92.54	n.a.	425	n.a.	n.a.	47	58
763-11-CL11-0-1	Monsegur Ref	Far field	30.59	15.54	0.37	6.48	5.55	0.28	3.21	34.79	0.69	0.07	0.26	0.7		45	3127	21	25	198	890	6	7	75	9	1018	133	14	245	36
763-11-CL11-1-2	Monsegur Ref	Far field	33.33	12.31	0.32	5.45	5.99	0.29	2.2	36.66	0.36	0.04	0.3	0.71		54	3122	22	25	145	2029	6	6	53	8	1166	143	16	286	33
763-11-CL6-0-1	Monsegur Ref	Far field	32.17	14.01	0.36	5.83	5.46	0.32	2.73	35.41	0.72	0.07	0.26	0.76		46	3259	24	25	185	998	6	7	63	9	1037	136	14	247	34
763-11-CL6-1-2	Monsegur Ref	Far field	32.96	12.66	0.32	5.55	5.88	0.29	2.36	36.31	0.6	0.05	0.29	0.67		52	3198	29	25	138	1087	6	7	56	8	1124	138	15	277	33
		n.a.	not analysed				LOI	Lost On Ignition
		Sulphur analysis: in bold results obtained from fused beads / other values were obtained from pressed pellet analyses
		Fusion Beads: Major and minor elements (and Ba, Cr, Cu, Ni, Sr, Zn, Zr)
		0.5g of samples (calcined à 1000°C) with 9g of a combination of Li tetraborate(90%) and Li nitrate(10%) + 0.3 of Na bromure
		Fusion Beads: S analysis
		for sulphides-domintated sediments only: 0.3g of sample with 10g of a combination of Li tetraborate(90%) and Li nitrate(10%) + 0.3 of Na bromure
		Pressed pellet: Trace elements (and S for 21/23 sediments)
		6g of sample with 0.6g of wax
