# Supplementary material for: Benthic foraminiferal species tolerance for hydrothermal activity: a case of study from the Lucky Strike vent field
Source: Copernicus journal article supplement (doi:10.5194/egusphere-2026-133), 2026-01-23
Supplement: Supplementary file 2 [file Supplementary 6_ raw faunal data.xlsx]

## Sheet: Feuil1
Dead fauna
split	1	1ml/11,5ml	1ml/15ml	1	1	1ml/15ml	1ml/24,5ml	1	1	1	1
	755-3_CL6	755-03_CL10	755-03-CL11	757-05-CL6	757-05-CL7	759-07_CL06	760-08_CL06	760-08_CL07	761-9_CL6	763-11_CL6	763-11_CL11
Alabaminella weddellensis	0	1				0	0	0	0	0	2
Allogromid sp.	0	0				0	0	0	0	0	0
Ammodiscus sp.	0	0	1		1	1	4	4	0	3	7
Anomalinoides globulosus	0	0	1			0	0	0	2	0	0
Bolivina alata	1	39	45			3	0	4	2	3	3
Bolivina spathulata	1	0				0	0	0	0	0	0
Cibicides pachyderma	5	51	135			12	51	20	16	27	12
Cibicides wuellerstorfi	15	37	53		16	100	56	16	1	131	56
Cornuspira sp.	0	0				0	0	0	0	0	1
Cruciloculina triangularis	1	51	80			45	6	24	0	47	11
Epistominella exigua	1	126.5	120			0	73.5	9	20	0	1
Eubuliminella exilis	1	0	15			18	0	5	0	1	12
Favulina hexagona	0	23				0	0	1	0	0	0
Fissurina annectens	1	4	9			3	2	2	0	1	4
Fissurina foliformis	10	129	450			67	171.5	96	1	12	7
Fissurina laevigata	9	69.5	210			16	0	4	1	9	12
Fissurina orbignyana	112	333	477	5	15	303	266	53	1	98	31
Fissurina var. saturni	0	6	15			8	8	4	1	5	4
Gavelinopsis translucens	10	28.5	120			118	294	39	15	1	4
Globobulimina sp	0	0	2			0	0	1	0	1	0
Globocassidulina subglobosa	3	1	23			44	14	8	4	9	1
Hoeglundina elegans	2	1				0	0	0	0	2	0
Karreriella bradyi	0	1	15			30	24.5	5	0	0	1
Lagena striata	5	2				8	0	5	1	5	3
Lagnea radiata	0	0	1			0	49	6	0	0	0
Laticarinina pauperata	0	0				0	0	0	0	1	3
Lenticulina orbicularis	0	0				0	0	2	0	0	0
Lenticulina sp	0	0				0	0	0	0	1	0
Martinottiella cylindrica	0	0				3	0	17	5	0	4
Melonis affinis	0	0	5			1	0	0	2	0	0
Neolenticulina variabilis	0	3				0	4	0	0	1	1
Nodosaria sp	0	0				0	0	0	0	1	0
Nonionella jacksonensis	0	0				0	0	1	0	0	0
Protoglobobulimina pupoides	0	0				2	0	1	0	2	0
Pullenia quinqueloba	0	5	2	3	2	6	0	1	0	12	5
Pyrgo infornata	9	72	89			9	28	30	0	150	68
Pyrgoella irregularis	2	5	20			4	2	2	0	4	4
Pyrgo depressa	0	1				0	0	0	0	0	0
Quinquloculina auberiana	49	428	924	4	15	305	365	199	5	593	309
Rhabdammina (fragment)	0	0				1	0	0	0	0	0
Reophax agglutinatus	0	0				0	6	4	0	0	0
Reussoolina laevis	2	5				2	0	2	1	0	0
Robertinoides sp	0	0				0	0	0	0	2	0
Sigmoilopsis schlumbergeri	0	0				0	0	0	0	0	0
Spiroloculina sp.	0	1	15			1	24.5	4	0	2	5
Stainforthia fusiformis	0	0				0	0	1	0	2	0
Textularia sp	0	0				0	0	0	0	1	0
Trifarina sp	1	0				0	0	0	0	0	0
Triloculina oblonga	9	118	29			8	0	35	1	35	56
Uvigerina auberiana	0	2				5	0	6	3	2	2
Uvigerina peregrina	1	25	60			0	0	8	3	0	2
Vaginulina sp	2	3	15			5	0	2	0	2	3
Vanhoeffenella sp	0	0				1	0	0	1	0	0
undetermined	0	0				15	0	0	0	1	0
Living fauna
	755-3_CL6_0-1 cm	755-03_CL10_0-1cm	755-03-CL11	757-05-CL6	757-05-CL7	759-07_CL06_0-1cm	760-08_CL06_0-1cm	760-08_CL07_0-1cm	761-9_CL6_0-1 cm	763-11_CL6_0-1 cm	763-11_CL11
Alabaminella weddellensis	0	2				0	0	0	0	6	7
Allogromid sp.	0	0				0	5	0	1	0	0
Ammodiscus sp	1	0	1			9	13	0	0	1	2	27
Anomalinoides globulosus	0	0				0	0	0	0	1	0
Bolivina alata	0	0				5	1	1	1	4	4
Bolivina spathulata	0	0				0	0	0	0	0	0
Cibicides pachyderma	1	2				1	5	0	11	4	1
Cibicides wuellerstorfi	1	1		1		2	1	0	0	7	8
Cornuspira sp	0	0				0	0	0	0	0	0
Cruciloculina triangularis	0	0	6			3	0	0	0	1	0
Epistominella exigua	0	0				0	0	0	8	10	1
Eubuliminella exilis	0	0				0	0	0	0	0	0
Favulina hexagona	0	0				0	0	0	0	0	0
Fissurina annectens	0	0				0	0	0	0	0	0
Fissurina foliformis	0	0				1	0	0	0	2	0
Fissurina laevigata	0	2				3	8	0	0	2	4
Fissurina orbignyana	6	5	4		1	13	5	0	0	13	2
Fissurina var. saturni	0	2				1	0	0	0	0	1
Gavelinopsis translucens	3	4				0	22	0	4	0	7
Globobulimina sp	0	0				0	0	1	1	0	0
Globocassidulina subglobosa	0	0				5	0	0	0	0	0
Hoeglundina elegans	0	1				0	0	0	0	0	0
Karreriella bradyi	1	0				0	0	0	0	0	0
Lagena striata	0	0				2	0	0	0	1	0
Lagnea radiata	0	0				0	0	0	0	0	0
Laticarinina pauperata	0	0				0	0	0	0	0	0
Lenticulina orbicularis	0	0				1	0	0	0	0	0
Lenticulina sp	0	0				0	0	0	0	0	0
Martinottiella cylindrica	0	0				0	0	0	0	0	0
Melonis affinis	0	0				0	0	0	2	1	0
Neolenticulina variabilis	0	0				1	0	0	0	0	1
Nodosaria sp	0	0				0	0	0	0	1	0
Nonionella jacksonensis	0	0				0	0	0	0	0	0
Protoglobobulimina pupoides	0	0				1	0	0	0	0	0
Pullenia quinqueloba	0	1				0	0	0	0	0	0
Pyrgo infornata	0	1				1	2	0	1	0	4
Pyrgoella irregularis	0	1	2			5	0	0	0	0	0
Pyrgo depressa	0	0				0	0	0	0	0	0
Quinquloculina auberiana	0	9	16		2	17	13	3	5	36	8
Rhabdammina (fragment)	0	0				0	0	0	0	0	0
Reophax agglutinatus	0	0				0	4	0	0	4	6
Reussoolina laevis	0	0				0	0	0	0	0	0
Robertinoides sp	0	1				0	2	0	0	1	0
Sigmoilopsis schlumbergeri	0	0				0	1	0	0	0	0
Spiroloculina sp.	0	0				0	0	0	0	1	0
Stainforthia fusiformis	0	0				0	0	0	0	1	0
Textularia sp	0	0				0	0	0	0	0	0
Trifarina sp	0	0				0	0	0	0	0	0
Triloculina oblonga	0	0	5			1	1	1	0	0	1
Uvigerina auberiana	0	0				0	0	1	0	1	0
Uvigerina peregrina	0	1				0	0	0	1	2	0
Vaginulina sp	1	0				1	0	0	0	1	0
Vanhoeffenella sp	2	0				8	0	0	3	0	1
